# Supplementary material for: Effect of Metal Complexing on Mn–Fe/TS-1 Catalysts for Selective Catalytic Reduction of NO with NH3
Source: MDPI journal article supplement (doi:10.3390/molecules28073068), 2023-03-29
Supplement: s1 [file s1]

# Supplementary Materials

## Effect of Metal Complexing on Mn-Fe/TS-1 Catalysts for Selective Catalytic Reduction of NO with NH<sub>3</sub>

Yuanyuan Ma <sup>1,\*</sup>, Wanting Liu <sup>1</sup>, Zhifang Li <sup>2</sup>, Yuhang Sun <sup>1</sup>, Mingyuan Shi <sup>1</sup>, Zheng Nan <sup>1</sup>, Ruotong Song <sup>1</sup>, Liying Wang <sup>1</sup> and Jingqi Guan <sup>3,\*</sup>

<sup>1</sup> College of Chemistry and Chemical Engineering, Qiqihar University, Qiqihar 161006, China

<sup>2</sup> College of Materials Science and Engineering, Qiqihar University, Qiqihar 161006, China

<sup>3</sup> Institute of Physical Chemistry, College of Chemistry, Jilin University, 2519 Jiefang Road, Changchun 130021, China

\* Correspondence: mayuanyuan1219@126.com (Y.M.); guanjq@jlu.edu.cn (J.G.)

Figure S1

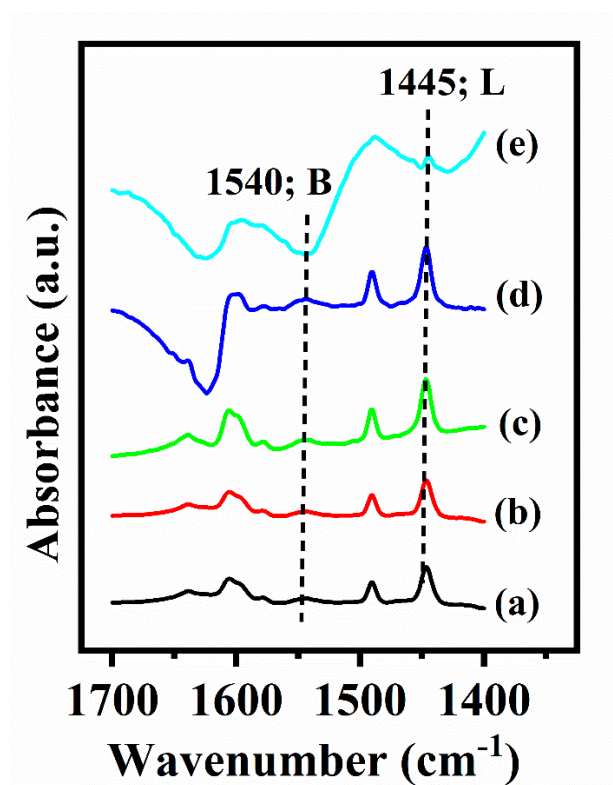

**Figure S1.** Pyridine FT-IR spectra of Mn-Fe/TS-1(R-0) (a), Mn-Fe/TS-1(R-0.5) (b), Mn-Fe/TS-1(R-1) (c), Mn-Fe/TS-1(R-2) (d) and Mn-Fe/TiO<sub>2</sub> (e) at 373 K.
